# Supplementary material
Source: PubMed Central journal article supplement (PMC4641837)
Supplement: NIHMS705733-supplement-supplement_1.pdf [file NIHMS705733-supplement-supplement_1.pdf]

## SUPPLEMENTAL FIGURES

**Figure E1.** Heat map depicting clustering of individual items in SNOT-22 questionnaire in CRS patients. Pair-wise correlation matrix with clustering was employed to place increasingly associated symptoms together. Color represents degree of similarity with highly similar cells in red.

**Figure E2. A.** Organized but random layout of patients (grey nodes) and symptoms (white nodes, center). **B,** Network depicting a layout after application of force directed and weighted degree centrality (WDC) algorithms revealing structure to the symptom patterns. Size of variable nodes (white, symptoms) corresponds to degree centrality.

**Figure E3.** Final network reveals symptom heterogeneity. Node size corresponds weighted degree centrality (WDC). The clusters are red (A), orange (B), green (C), cyan (D) and blue (E) color. Dendrogram clustering is shown (inset). Black dashed line represents sinonasal symptom cluster. Patients with H-AS sensitivity, square nodes ( $\square$ ); circular nodes (o) without (AT). \* represents ASA challenged patients confirmed ASA sensitivity.

**Supplementary table 1.** Network analysis involving distance metric. Proximity of each cluster to predominant symptom clusters was calculated using mean weights. Edge weight (computed from the patient response to individual SNOT item) is inversely proportional to distance between nodes, thus higher edge weights represent shorter internode distance and therefore closely associating nodes.

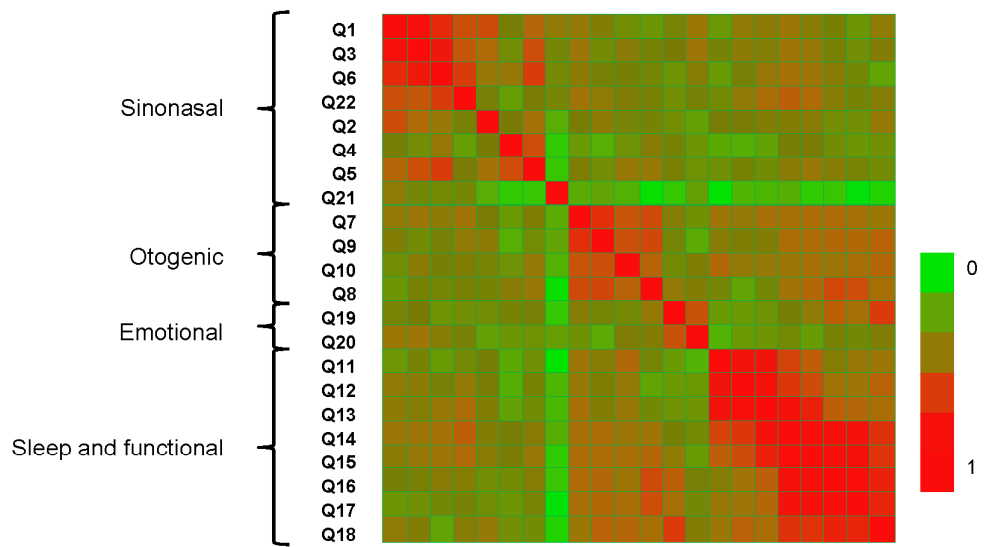

Figure E1

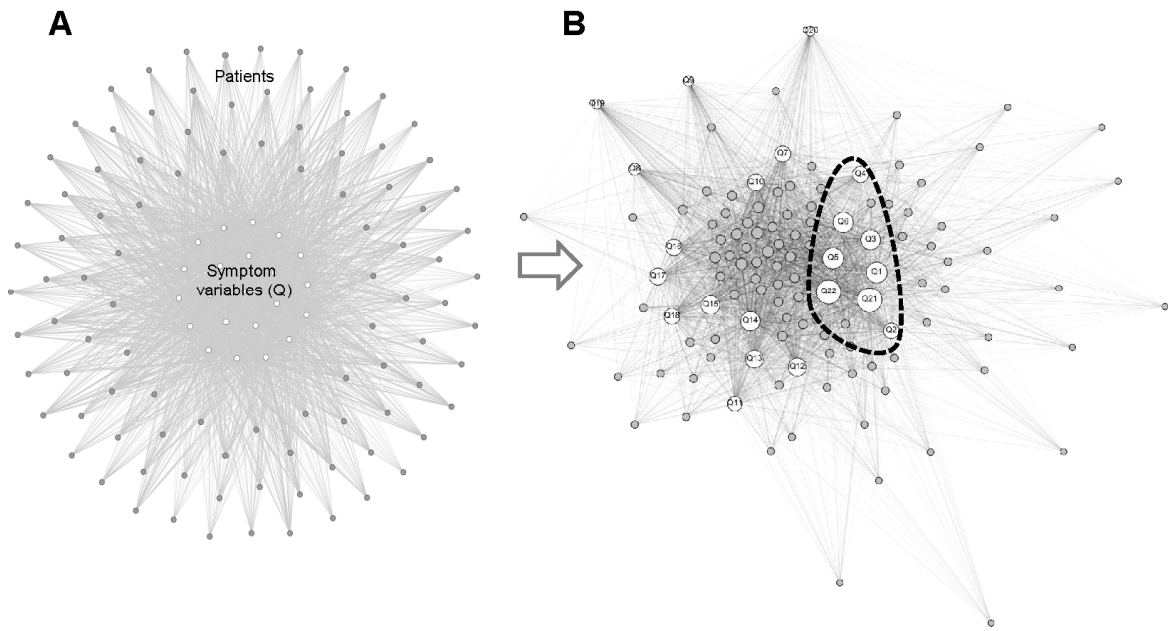

**E D C B A** Patient clusters

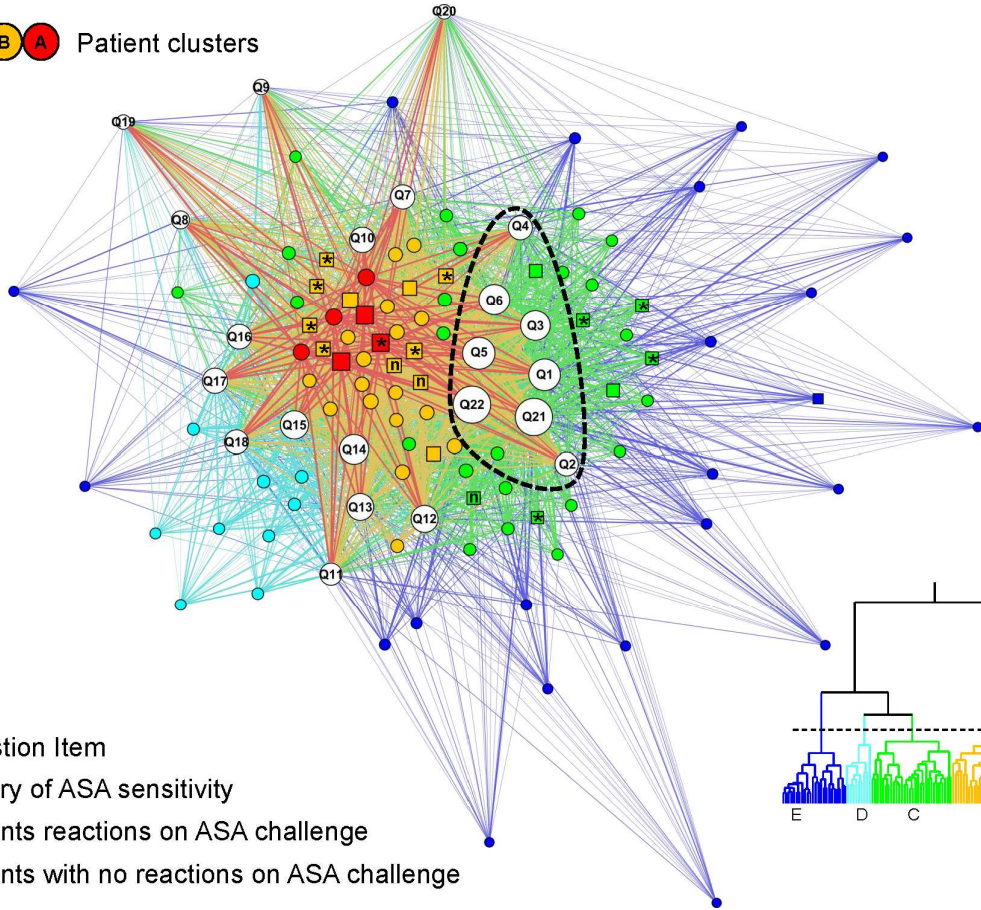

Ⓚ<sub>n</sub> Question Item

□ History of ASA sensitivity

\* Patients reactions on ASA challenge

n Patients with no reactions on ASA challenge

Distance analysis to calculate the affinity of patient clusters with symptom clusters.

| <b>Cluster</b> | <b>(Distance)<sup>-1</sup><br/>Mean ± SD<br/>(AU)</b> | <b>(Mean distance)<sup>-1</sup> to<br/>Sinonasal<br/>symptom<br/>cluster (Dotted<br/>line)</b> | <b>(Mean distance)<sup>-1</sup><br/>to<br/>Non Sinonasal<br/>symptoms</b> | <b>p</b> | <b>Affinity to<br/>cluster</b> |
|----------------|-------------------------------------------------------|------------------------------------------------------------------------------------------------|---------------------------------------------------------------------------|----------|--------------------------------|
| <b>A (6)</b>   |                                                       | 4.14 ± 1.3                                                                                     | 4.14 ± 1.3                                                                | 1        | Both                           |
| <b>B (28)</b>  |                                                       | 3.35 ± 1.3                                                                                     | 2.7 ± 1.5                                                                 | 0.0001   | Sinonasal                      |
| <b>C (30)</b>  |                                                       | 2.87 ± 1.4                                                                                     | 1.51 ± 1.4                                                                | 0.0001   | Sinonasal                      |
| <b>D (10)</b>  |                                                       | 1.3 ± 1.5                                                                                      | 2.06 ± 1.6                                                                | 0.0006   | Non Sinonasal                  |
| <b>E (23)</b>  |                                                       | 1.37 ± 1.3                                                                                     | 0.62 ± 1                                                                  | 0.0001   | Sinonasal                      |

Table Supp 1
